# Supplementary material for: Long-Term Assessment of a Water Safety Plan (WSP) in Salta, Argentina
Source: MDPI journal article supplement (doi:10.3390/w14192948), 2022-09-20
Supplement: s1 [file s1]

Archive with 1 entries (1 files):
- water-1817868-supplementary.pdf
