# Supplementary material for: Long-Term Assessment of a Water Safety Plan (WSP) in Salta, Argentina
Source: MDPI journal article supplement (doi:10.3390/w14192948), 2022-09-20
Supplement: s1 [file s1 › water-1817868-supplementary.pdf]

## SUPPLEMENTARY MATERIAL

**TABLE S1. Hazardous events, control measures and compliance of the control measures in 2016 for each system**

### System No. 1

| Process              | Hazard event                          | Control measures                                                                                  | Compliance percentage in 2016 |
|----------------------|---------------------------------------|---------------------------------------------------------------------------------------------------|-------------------------------|
| Subsurface catchment | Floods                                | Defence works to optimise drainage systems. Studies for system improvements.                      | 0%                            |
|                      | Meteorological and climatic phenomena | Defence works to optimise drainage systems. Studies for system improvements.                      | 0%                            |
|                      | Erosive phenomena                     | Defence works to optimise drainage systems. Studies for system improvements.                      | 0%                            |
|                      | Poor security                         | Optimisation of the existing security system, e.g. replacement of padlocks, metal covers, plates. | 100%                          |
|                      | Droughts                              | Use of alternative water sources.                                                                 | 100%                          |
| Surface catchment    | Agriculture                           | Negotiate with the watershed manager for the regulation of agriculture and livestock in the area. | 50%                           |
|                      |                                       | Control to avoid the use of chemical products.                                                    | 0%                            |
|                      |                                       | Construction of a new water treatment plant.                                                      | 0%                            |
|                      | Domestic animals and livestock        | Negotiate with the watershed manager for the regulation of agriculture and livestock in the area. | 50%                           |
|                      |                                       | Establishing a specific area for pig, bovine, sheep and goat livestock.                           | 0%                            |
|                      |                                       | Construction of a new water treatment plant.                                                      | 0%                            |
|                      |                                       | Fencing of the water catchment area.                                                              | 100%                          |
|                      | Poor maintenance                      | Optimisation of installations in general.                                                         | 100%                          |
|                      |                                       | Continuous monitoring of intakes and rivers. Continuous inspections of facilities.                | 100%                          |
|                      | Floods                                | Use of alternative water sources.                                                                 | 100%                          |
|                      |                                       | River protection works.                                                                           | 0%                            |
|                      |                                       | Ability to close the water intakes.                                                               | 100%                          |
|                      |                                       | Construction of a new water treatment plant.                                                      | 0%                            |
|                      | Insufficient security staff           | Introduce a rotating guard service to control the various treatment units.                        | 0%                            |

|                |                                            |                                                                                                      |      |
|----------------|--------------------------------------------|------------------------------------------------------------------------------------------------------|------|
|                | Cesspools and latrines                     | Investigation of cesspools and studies on treatment systems that minimise the risk of contamination. | 0%   |
|                | Meteorological and climatic phenomena      | Use of alternative water sources.                                                                    | 100% |
|                |                                            | River protection works.                                                                              | 0%   |
|                |                                            | Ability to close the water intakes.                                                                  | 100% |
|                |                                            | Construction of a new water treatment plant.                                                         | 0%   |
|                | Poor security                              | Fencing of the water catchment area.                                                                 | 100% |
|                |                                            | Continuous monitoring of intakes and rivers. Continuous inspections of facilities.                   | 100% |
|                |                                            | Sealing and waterproofing of the chambers.                                                           | 0%   |
|                |                                            | Water piping.                                                                                        | 0%   |
|                |                                            | Optimisation of the existing security system, e.g. replacement of padlocks, metal covers, plates.    | 100% |
|                | Droughts                                   | Use of alternative water sources.                                                                    | 100% |
|                | Improper recreational use                  | Fencing of the water catchment area.                                                                 | 100% |
|                |                                            | Work with the relevant provincial authority to establish exclusion zones in catchment areas.         | 70%  |
|                | Passage of vehicles through water channels | Water piping in road crossings.                                                                      | 100% |
| Transport      | Infrastructure in poor condition           | Plan for maintenance and improvement of obsolete facilities.                                         | 100% |
|                |                                            | Water piping.                                                                                        | 0%   |
|                | Pipe breakage                              | Plan for the maintenance and upkeep of the water supply.                                             | 0%   |
|                | Poor security                              | Optimisation of the existing security system, e.g. replacement of padlocks, metal covers, plates.    | 100% |
|                | Earthquakes                                | Have prevention and contingency plans in place. Train all staff and conduct drills.                  | 50%  |
| Potabilization | Agriculture                                | Negotiate with the watershed manager for the regulation of agriculture and livestock in the area.    | 50%  |
|                |                                            | Control to avoid the use of chemical products.                                                       | 0%   |
|                |                                            | Construction of a new water treatment plant.                                                         | 0%   |
|                | Domestic animals and livestock             | Negotiate with the watershed manager for the regulation of agriculture and livestock in the area.    | 70%  |
|                |                                            | Establishing a specific area for pig, bovine, sheep and goat livestock.                              | 0%   |
|                |                                            | Construction of a new water treatment plant.                                                         | 0%   |

|  |                                       |                                                                                                      |      |
|--|---------------------------------------|------------------------------------------------------------------------------------------------------|------|
|  |                                       | Fencing of the water catchment area.                                                                 | 100% |
|  | Insufficient treatment capacity       | Optimisation of drinking water systems. Change of support and filter mantle.                         | 0%   |
|  |                                       | Expansion of the existing facilities.                                                                | 0%   |
|  |                                       | Construction of a new water treatment plant.                                                         | 0%   |
|  | Poor maintenance                      | Optimisation of drinking water systems. Change of support and filter mantle.                         | 0%   |
|  | Pollution sources                     | Investigation of cesspools and studies on treatment systems that minimise the risk of contamination. | 0%   |
|  |                                       | Chromatographic analysis of organophosphate parameters.                                              | 0%   |
|  |                                       | Expansion of the existing facilities.                                                                | 0%   |
|  |                                       | Construction of a new water treatment plant.                                                         | 0%   |
|  | Insufficient security staff           | Permanent staff for the operation of the water treatment plants.                                     | 100% |
|  |                                       | Dosing protocol for chemical products.                                                               | 0%   |
|  | Meteorological and climatic phenomena | Expansion of the existing facilities.                                                                | 0%   |
|  |                                       | Construction of a new water treatment plant.                                                         | 0%   |
|  | Poor security                         | Introduce a rotating guard service to control the various treatment units.                           | 0%   |

## System No. 2

| Process              | Hazard event                          | Control measures                                                                                                                            | Compliance percentage in 2016 |
|----------------------|---------------------------------------|---------------------------------------------------------------------------------------------------------------------------------------------|-------------------------------|
| Subsurface catchment | Agriculture                           | Application of restrictive measures. Cooperation with the Protected Areas Agency of the Ministry of Environment and Sustainable Production. | 100%                          |
|                      |                                       | Establishment of minimum distances for agriculture and livestock.                                                                           | 0%                            |
|                      |                                       | Application of legislation on prohibitions in the protection zone.                                                                          | 100%                          |
|                      | Conflict with the easement            | Negotiate to be able to exercise the rights of the easement already managed without restrictions.                                           | 0%                            |
|                      | Arids extraction                      | Regulation of the arids extraction system - Permanent controls.                                                                             | 100%                          |
|                      | Technical defects of the construction | Sealing and waterproofing of the chambers.                                                                                                  | 0%                            |
|                      | Floods                                | Construction of defences in drainage systems.                                                                                               | 0%                            |

|                   |                                       |                                                                                                                                             |      |
|-------------------|---------------------------------------|---------------------------------------------------------------------------------------------------------------------------------------------|------|
|                   |                                       | Ability to close the water intakes in case of increased turbidity.                                                                          | 100% |
|                   | Meteorological and climatic phenomena | Construction of defences in drainage systems.                                                                                               | 0%   |
|                   |                                       | Ability to close the water intakes in case of increased turbidity.                                                                          | 100% |
|                   | Erosive phenomena                     | Construction of defences in drainage systems.                                                                                               | 0%   |
|                   | Poor security                         | Optimisation of the existing security system, e.g. replacement of padlocks, metal covers, plates.                                           | 50%  |
|                   | Droughts                              | Keep emergency well systems in operation.                                                                                                   | 100% |
|                   |                                       | Optimisation of the plant.                                                                                                                  | 0%   |
|                   |                                       | Management with Water Resources for the opening of the dam gate.                                                                            | 100% |
|                   |                                       | Construction of a new water treatment plant.                                                                                                | 0%   |
| Surface catchment | Agriculture                           | Application of restrictive measures. Cooperation with the Protected Areas Agency of the Ministry of Environment and Sustainable Production. | 100% |
|                   |                                       | Establishment of minimum distances for agriculture and livestock.                                                                           | 0%   |
|                   |                                       | Application of legislation on prohibitions in the protection zone.                                                                          | 100% |
|                   |                                       | Strict controls on water quality.                                                                                                           | 100% |
|                   |                                       | Construction of a new water treatment plant.                                                                                                | 0%   |
|                   | Domestic animals and livestock        | Application of restrictive measures. Cooperation with the Protected Areas Agency of the Ministry of Environment and Sustainable Production. | 100% |
|                   |                                       | Establishment of minimum distances for agriculture and livestock.                                                                           | 0%   |
|                   |                                       | Application of legislation on prohibitions in the protection zone.                                                                          | 100% |
|                   |                                       | Strict controls on water quality.                                                                                                           | 100% |
|                   |                                       | Construction of a new water treatment plant.                                                                                                | 0%   |
|                   |                                       | Fencing of the water catchment area.                                                                                                        | 0%   |
|                   | Poor maintenance                      | Continuous monitoring of intakes and rivers. Continuous inspections of facilities.                                                          | 100% |
|                   | Floods                                | Construction of defences in surface catchment.                                                                                              | 0%   |
|                   | Meteorological and climatic phenomena | Optimisation of the plant.                                                                                                                  | 0%   |
|                   | Poor security                         | Optimisation of the existing security system, e.g. replacement of padlocks, metal covers, plates.                                           | 50%  |
|                   |                                       | Fencing of the water catchment area.                                                                                                        | 0%   |

|                |                                       |                                                                                                                                             |      |
|----------------|---------------------------------------|---------------------------------------------------------------------------------------------------------------------------------------------|------|
|                | Droughts                              | Keep emergency well systems in operation.                                                                                                   | 100% |
|                |                                       | Optimisation of the plant.                                                                                                                  | 0%   |
|                |                                       | Management with Water Resources for the opening of the dam gate.                                                                            | 100% |
|                |                                       | Construction of a new water treatment plant.                                                                                                | 0%   |
| Transport      | Failure of a material or component    | Repair of existing water losses.                                                                                                            | 50%  |
|                | Technical defects of the construction | Optimisation of drainage chambers and air valves.                                                                                           | 50%  |
|                | Poor maintenance                      | Maintenance plan for air valves, drainage chambers, etc. and improvement of obsolete facilities.                                            | 50%  |
|                | Infrastructure in poor condition      | Repair of existing water losses.                                                                                                            | 50%  |
|                |                                       | Maintenance plan for air valves, drainage chambers, etc. and improvement of obsolete facilities.                                            | 50%  |
|                | Pipe breakage                         | Repair of existing water losses.                                                                                                            | 50%  |
|                | Erosive phenomena                     | Defence works in the sections of the aqueduct most likely to be affected.                                                                   | 0%   |
|                | Poor security                         | Optimisation of the existing security system, e.g. replacement of padlocks, metal covers, plates.                                           | 50%  |
|                | Earthquakes                           | Have prevention and contingency plans in place. Train all staff and conduct drills.                                                         | 50%  |
| Potabilization | Agriculture                           | Application of restrictive measures. Cooperation with the Protected Areas Agency of the Ministry of Environment and Sustainable Production. | 100% |
|                |                                       | Establishment of minimum distances for agriculture and livestock.                                                                           | 0%   |
|                |                                       | Application of legislation on prohibitions in the protection zone.                                                                          | 100% |
|                |                                       | Strict controls on water quality.                                                                                                           | 100% |
|                |                                       | Construction of a new water treatment plant.                                                                                                | 0%   |
|                | Domestic animals and livestock        | Application of restrictive measures. Cooperation with the Protected Areas Agency of the Ministry of Environment and Sustainable Production. | 100% |
|                |                                       | Establishment of minimum distances for agriculture and livestock.                                                                           | 0%   |
|                |                                       | Application of legislation on prohibitions in the protection zone.                                                                          | 100% |
|                |                                       | Strict controls on water quality.                                                                                                           | 100% |
|                |                                       | Construction of a new water treatment plant.                                                                                                | 0%   |
|                |                                       | Fencing of the water catchment area.                                                                                                        | 0%   |
|                | Insufficient treatment capacity       | Optimisation of the plant.                                                                                                                  | 0%   |

|  |                                       |                                                                           |      |
|--|---------------------------------------|---------------------------------------------------------------------------|------|
|  |                                       | Construction of a new water treatment plant.                              | 0%   |
|  | Power outage                          | Install emergency generators.                                             | 0%   |
|  | Pollution sources                     | Monitoring and control of the disposal of waste water.                    | 0%   |
|  | Meteorological and climatic phenomena | Optimisation of the plant.                                                | 0%   |
|  |                                       | Construction of a new water treatment plant.                              | 0%   |
|  | Poor security                         | Permanent surveillance, control of the relevant water quality parameters. | 100% |

### System No. 3

| Process              | Hazard event                          | Control measures                                                                                                                                     | Compliance percentage in 2016 |
|----------------------|---------------------------------------|------------------------------------------------------------------------------------------------------------------------------------------------------|-------------------------------|
| Subsurface catchment | Conflict with the easement            | Regularisation of property.                                                                                                                          | 100%                          |
|                      | Technical defects of the construction | Waterproofing / Optimization of drainage chambers and valves.                                                                                        | 100%                          |
|                      | Floods                                | Channelisation of storm water drains.                                                                                                                | 33%                           |
|                      |                                       | Defence works for the cameras. Canalisation of the river.                                                                                            | 33%                           |
|                      |                                       | Waterproofing / Optimization of drainage chambers and valves.                                                                                        | 33%                           |
|                      | Meteorological and climatic phenomena | Channelisation of storm water drains.                                                                                                                | 33%                           |
|                      |                                       | Defence works for the cameras. Canalisation of the river.                                                                                            | 33%                           |
|                      |                                       | Waterproofing / Optimization of drainage chambers and valves.                                                                                        | 33%                           |
|                      | Erosive phenomena                     | Defence works for the cameras. Canalisation of the river.                                                                                            | 100%                          |
|                      | Poor security                         | Cover chambers - Installation of padlocks - Security systems.                                                                                        | 100%                          |
|                      | Droughts                              | Well optimisation - Search for alternative sources.                                                                                                  | 100%                          |
| Transport            | Technical defects of the construction | Verification of the sections most susceptible to the action of pressure.                                                                             | 100%                          |
|                      | Poor maintenance                      | Maintenance work on the valves. Coordinated operational work to avoid unfavourable manoeuvres. Pressure monitoring and recording.                    | 100%                          |
|                      | Pressure fluctuations                 | Maintenance work on the valves. Coordinated operational work to avoid unfavourable manoeuvres. Pressure monitoring and recording.                    | 100%                          |
|                      | Pipe breakage                         | Repair of existing water losses. Assessment of sections of the aqueduct affected due to defective installation and planning of replacement measures. | 100%                          |

|                |                                       |                                                                                                       |      |
|----------------|---------------------------------------|-------------------------------------------------------------------------------------------------------|------|
| Potabilization | Earthquakes                           | Have prevention and contingency plans in place. Train all staff and conduct drills.                   | 100% |
|                | Poor security                         | Cover chambers - Installation of padlocks - Security systems.                                         | 100% |
|                | Inadequate disinfection               | Commissioning of the disinfection system with chlorine gas in compliance with all safety regulations. | 100% |
|                | Meteorological and climatic phenomena | Channelisation of storm water drains.                                                                 | 50%  |
|                |                                       | Defence works for the cameras. Canalisation of the river.                                             | 50%  |

#### System No. 4

| Process               | Hazard event                          | Control measures                                                                                                                   | Compliance percentage in 2016 |
|-----------------------|---------------------------------------|------------------------------------------------------------------------------------------------------------------------------------|-------------------------------|
| Groundwater catchment | Inadequacies in operating conditions  | Control plan for old wells (in operation for approx. 15 years).                                                                    | 33%                           |
|                       |                                       | Work plan to verify that the depth of installation in relation to the position of the filters is consistent with the static level. | 33%                           |
|                       |                                       | Work plan to control static and dynamic levels.                                                                                    | 33%                           |
|                       | Power outage                          | Install generators in all wells or in wells in high supply areas. Adapt facilities for connecting generators.                      | 40%                           |
|                       |                                       | The pre-feasibilities must make do with installations suitable for power generators.                                               | 20%                           |
|                       |                                       | Plan for interconnection of systems.                                                                                               | 40%                           |
|                       | Unsafe dynamics of the aquifer        | Watershed study requirements.                                                                                                      | 100%                          |
|                       | Technical defects of the construction | Remedial measures in case of construction defects.                                                                                 | 50%                           |
|                       |                                       | Permanent inspection during construction works according to the requirements of the applicable regulations.                        | 50%                           |
|                       | Poor maintenance                      | Control plan for old wells (in operation for approx. 15 years).                                                                    | 25%                           |
|                       |                                       | Work plan to verify that the depth of installation in relation to the position of the filters is consistent with the static level. | 25%                           |
|                       |                                       | Include new wells in a predictive maintenance plan.                                                                                | 25%                           |
|                       |                                       | Improve obsolete facilities that are in use: Infrastructures, fences, chlorination plants, control panel, etc.                     | 25%                           |
|                       | Pollution sources                     | Plan for interconnection of systems.                                                                                               | 25%                           |
|                       |                                       | Take measures against polluting elements.                                                                                          | 25%                           |
|                       |                                       | Search for alternative sources.                                                                                                    | 25%                           |

|                |                                  |                                                                                                                |      |
|----------------|----------------------------------|----------------------------------------------------------------------------------------------------------------|------|
|                |                                  | Permanent water monitoring.                                                                                    | 25%  |
|                | Infrastructure in poor condition | Improve obsolete facilities that are in use: Infrastructures, fences, chlorination plants, control panel, etc. | 100% |
|                | Poor security                    | Improve the security system of each well to prevent vandalism.                                                 | 100% |
|                | Earthquakes                      | Have prevention and contingency plans in place. Train all staff and conduct drills.                            | 100% |
| Potabilization | Power outage                     | Install generators in all wells or in wells in high supply areas. Adapt facilities for connecting generators.  | 50%  |
|                |                                  | The pre-feasibilities must make do with installations suitable for power generators.                           | 50%  |
|                | Inadequate disinfection          | Monitoring and control of the disinfection systems.                                                            | 100% |
|                | Poor maintenance                 | Improve obsolete facilities that are in use: Infrastructures, fences, chlorination plants, control panel, etc. | 100% |
|                | Pollution sources                | Establishment of environmental base line in each of the deep well sources.                                     | 100% |
|                | Infrastructure in poor condition | Improve obsolete facilities that are in use: Infrastructures, fences, chlorination plants, control panel, etc. | 100% |

#### System No. 5

| Process | Hazard event                          | Control measures                                                                                                                   | Compliance percentage in 2016 |
|---------|---------------------------------------|------------------------------------------------------------------------------------------------------------------------------------|-------------------------------|
|         | Pressure fluctuations                 | For new replacements, use pipes of suitable materials and pressure to prevent water or pressure surges from affecting the network. | 50%                           |
|         |                                       | Permanent monitoring and recording of pressures.                                                                                   | 50%                           |
|         | Technical defects of the construction | Replacement plan for networks and valves with repeated breaks.                                                                     | 50%                           |
|         |                                       | Inspect new connections and the quality of the material.                                                                           | 50%                           |
|         | Poor maintenance                      | Permanent monitoring and recording of pressures.                                                                                   | 9%                            |
|         |                                       | Replacement plan for networks and valves with repeated breaks.                                                                     | 9%                            |
|         |                                       | Maintenance plan for valves and valve chambers.                                                                                    | 9%                            |
|         |                                       | Network cleaning plan for different systems (wells, cisterns, pumps, tanks, etc.).                                                 | 9%                            |
|         |                                       | Optimisation of the reserve tanks.                                                                                                 | 9%                            |
|         |                                       | Drain maintenance and installation.                                                                                                | 9%                            |
|         |                                       | Sealing of cisterns.                                                                                                               | 9%                            |

|  |                                  |                                                                                                                                                                |      |
|--|----------------------------------|----------------------------------------------------------------------------------------------------------------------------------------------------------------|------|
|  |                                  | Cleaning of cisterns.                                                                                                                                          | 9%   |
|  |                                  | Renovation of facilities, maintenance of lighting.                                                                                                             | 9%   |
|  |                                  | Keep distribution network maps up to date.                                                                                                                     | 9%   |
|  |                                  | Weed control in the installations.                                                                                                                             | 9%   |
|  | Infrastructure in poor condition | Maintenance plan for valves and valve chambers.                                                                                                                | 14%  |
|  |                                  | Replacement plan for networks and valves with repeated breaks.                                                                                                 | 14%  |
|  |                                  | Optimisation of the reserve tanks.                                                                                                                             | 14%  |
|  |                                  | Drain maintenance and installation.                                                                                                                            | 14%  |
|  |                                  | Sealing of cisterns.                                                                                                                                           | 14%  |
|  |                                  | Renovation of facilities, maintenance of lighting.                                                                                                             | 14%  |
|  |                                  | Weed control in the installations.                                                                                                                             | 14%  |
|  | Pipe breakage                    | Replacement plan for networks and valves with repeated breaks.                                                                                                 | 25%  |
|  |                                  | When repairing pipes, check for contamination and check the pressure.                                                                                          | 25%  |
|  |                                  | Plan for interconnection of systems.                                                                                                                           | 25%  |
|  |                                  | Keep distribution network maps up to date.                                                                                                                     | 25%  |
|  | Construction sites               | Coordinate with companies or organisations carrying out works on public roads that affect our infrastructure. Inspection of works carried out on public roads. | 100% |
|  | Pressure fluctuations            | Permanent monitoring and recording of pressures.                                                                                                               | 100% |
|  | Earthquakes                      | Have prevention and contingency plans in place. Train all staff and conduct drills.                                                                            | 100% |
|  | Unauthorized water connections   | Permanent monitoring of the water connection, imposition of fines.                                                                                             | 100% |
|  | Disruption of supply             | Water distribution plan with tankers in affected areas.                                                                                                        | 33%  |
|  |                                  | Permanent control of chlorination in the affected areas and of tankers.                                                                                        | 33%  |
|  |                                  | Plan for interconnection of systems.                                                                                                                           | 33%  |
